# Supplementary material for: Performance of virtual screening against GPCR homology models: Impact of template selection and treatment of binding site plasticity
Source: PLOS journal article supplement (doi:10.1371/journal.pcbi.1007680), 2020-03-13
Supplement: S9 (10.1371/journal.pcbi.1007680.s009) [file journal.pcbi.1007680.s009]

**S9 Table.** Average RMSDs to the starting structure (homology model) of MD snapshots of the D<sub>2</sub>R and 5-HT<sub>2A</sub>R.

| State<br>(template) <sup>a</sup>     | MD<br>Trajectory <sup>b</sup> | RMSD (Å) <sup>c</sup> |           |           |
|--------------------------------------|-------------------------------|-----------------------|-----------|-----------|
|                                      |                               | TMBB                  | BSBB      | Ligand    |
|                                      |                               | D <sub>2</sub> R      |           |           |
| <b>Apo<br/>(D<sub>3</sub>R)</b>      | 1                             | 1.8 ± 0.3             | 1.9 ± 0.4 | -         |
|                                      | 2                             | 1.9 ± 0.2             | 1.9 ± 0.3 | -         |
|                                      | 3                             | 1.6 ± 0.1             | 1.6 ± 0.2 | -         |
| <b>Apo<br/>(Rho)</b>                 | 1                             | 2.4 ± 0.2             | 2.4 ± 0.1 | -         |
|                                      | 2                             | 2.3 ± 0.1             | 2.4 ± 0.2 | -         |
|                                      | 3                             | 2.4 ± 0.2             | 2.3 ± 0.2 | -         |
| <b>Holo<br/>(D<sub>3</sub>R)</b>     | 1                             | 1.3 ± 0.1             | 1.2 ± 0.2 | 1.2 ± 0.3 |
|                                      | 2                             | 1.6 ± 0.2             | 1.2 ± 0.2 | 1.0 ± 0.2 |
|                                      | 3                             | 1.4 ± 0.1             | 1.6 ± 0.3 | 1.2 ± 0.2 |
|                                      |                               | 5-HT <sub>2A</sub> R  |           |           |
| <b>Apo<br/>(5-HT<sub>2C</sub>R)</b>  | 1                             | 1.7 ± 0.2             | 1.4 ± 0.1 | -         |
|                                      | 2                             | 2.2 ± 0.3             | 1.6 ± 0.2 | -         |
|                                      | 3                             | 1.7 ± 0.2             | 1.3 ± 0.1 | -         |
| <b>Apo<br/>(Rho)</b>                 | 1                             | 3.4 ± 0.4             | 3.8 ± 0.4 | -         |
|                                      | 2                             | 3.4 ± 0.4             | 3.9 ± 0.4 | -         |
|                                      | 3                             | 3.2 ± 0.2             | 3.6 ± 0.2 | -         |
| <b>Holo<br/>(5-HT<sub>2C</sub>R)</b> | 1                             | 2.2 ± 0.3             | 1.4 ± 0.2 | 1.1 ± 0.2 |
|                                      | 2                             | 2.1 ± 0.2             | 1.4 ± 0.2 | 1.0 ± 0.2 |
|                                      | 3                             | 2.0 ± 0.3             | 1.3 ± 0.1 | 1.0 ± 0.2 |

<sup>a</sup> MD simulations were carried out in the absence (apo) and presence (holo) of orthosteric ligand. The template used to create the homology model is shown in parenthesis.

<sup>b</sup> Three MD simulation trajectories of 100 ns were carried out for each homology model.

<sup>c</sup> RMSD ± standard deviation (1000 snapshots from 100 ns) for the TM backbone (TMBB), BS backbone (BSBB), and orthosteric ligand.
